# Supplementary material
Source: PubMed Central journal article supplement (PMC6439548)
Supplement: jamacardiol-4-223-s003.pdf [file jamacardiol-4-223-s003.pdf]

# Data Sharing Statement

Reardon. Two-Year Outcomes After Transcatheter Aortic Valve Replacement With Mechanical vs Self-expanding Valves. *JAMA Cardiol.* Published February 27, 2019. 10.1001/jamacardio.2019.0091

## Data

**Data available:** Yes

**Data types:** Other (please specify)

**Additional Information:** The data and study protocol for this clinical trial may be made available to other researchers in accordance with the Boston Scientific Data Sharing Policy.

**How to access data:** <http://www.bostonscientific.com/en-US/data-sharing-requests.html>

**When available:** With publication

## Supporting Documents

**Document types:** None

## Additional Information

**Who can access the data:** The data will be made available through this portal: <http://www.bostonscientific.com/en-US/data-sharing-requests.html>

**Types of analyses:** In response to requests for clinical trial patient-level data with scientific merit and intent, Boston Scientific may share validated, anonymized patient-level data from registered clinical trials with qualified healthcare practitioners or academic researchers

**Mechanisms of data availability:** In response to a formal clinical research proposal, and when the request is in the same therapeutic area as the original study, and when the scientific intent of the request is clear.
