# Supplementary material
Source: PubMed Central journal article supplement (PMC6439548)
Supplement: jamacardiol-4-223-s004.pdf [file jamacardiol-4-223-s004.pdf]

## Supplementary Online Content

Reardon MJ, Feldman TE, Meduri CU, et al. Two-year outcomes after transcatheter aortic valve replacement with mechanical vs self-expanding valves: the REPRISE III randomized clinical trial. *JAMA Cardiol*. Published online February 27, 2019.

doi:10.1001/jamacardio.2019.0091

**eTable 1.** Key baseline characteristics in REPRISE II

**eTable 2.** VARC-2 events between 0-1 and 1-2 years

**eFigure.** Mortality at 2 years in high-risk TAVR randomized trials

This supplementary material has been provided by the authors to give readers additional information about their work.

**eTable 1. Key Baseline Characteristics in REPRISE III**

|                                      | <b>CoreValve<br/>(N = 305)</b> | <b>LOTUS<br/>(N = 607)</b> |
|--------------------------------------|--------------------------------|----------------------------|
| Age, years                           | 82.9±7.6                       | 82.8±7.1                   |
| Female sex, %                        | 52.1                           | 50.1                       |
| STS score, %                         | 6.9±4.1                        | 6.7±4.0                    |
| Atrial fibrillation, %               | 31.6                           | 35.1                       |
| Pacemaker, %                         | 19.0                           | 17.8                       |
| Prior stroke, %                      | 14.5                           | 11.3                       |
| Aortic valve area (cm <sup>2</sup> ) | 0.70±0.19 (280)                | 0.69±0.19 (541)            |
| Mod/Severe Aortic regurgitation, %   | 8.0 (289)                      | 6.5 (558)                  |
| Mean aortic gradient (mmHg)          | 43.9±12.3 (294)                | 44.6±13.4 (575)            |
| Peak aortic gradient (mmHg)          | 72.4±18.1 (294)                | 73.6±20.8 (575)            |
| Mod/Sev Mitral regurgitation, %      | 11.7 (283)                     | 10.7 (554)                 |
| LVEF (%)                             | 55.9±11.8 (254)                | 56.1±11.4 (485)            |

Numbers are n (%).

**eTable 2. VARC-2 events between 0-1 and 1-2 years**

|                                                   | 0-1 years            |                  |                | 1-2 years            |                  |                |
|---------------------------------------------------|----------------------|------------------|----------------|----------------------|------------------|----------------|
|                                                   | CoreValve<br>(N=299) | Lotus<br>(N=592) | <i>P</i> value | CoreValve<br>(N=252) | Lotus<br>(N=514) | <i>P</i> value |
| All-cause Mortality or Disabling Stroke           | 53 (17.7)            | 78 (13.2)        | 0.07           | 28 (11.1)            | 56 (10.9)        | 0.93           |
| All-cause Mortality                               | 40 (13.4)            | 70 (11.8)        | 0.51           | 25 (9.9)             | 53 (10.3)        | 0.87           |
| Cardiovascular                                    | 29 (9.7)             | 45 (7.6)         | 0.28           | 16 (6.3)             | 34 (6.6)         | 0.89           |
| Stroke                                            | 28 (9.4)             | 41 (6.9)         | 0.20           | 5 (2.0)              | 8 (1.6)          | 0.77           |
| Disabling                                         | 21 (7.0)             | 21 (3.5)         | 0.02           | 4 (1.6)              | 6 (1.2)          | 0.74           |
| Non-Disabling                                     | 7 (2.3)              | 21 (3.5)         | 0.33           | 1 (0.4)              | 2 (0.4)          | >0.99          |
| Major Vascular Complications                      | 18 (6.0)             | 45 (7.6)         | 0.38           | 1 (0.4)              | 0 (0.0)          | 0.33           |
| Permanent pacemaker implantation:<br>All patients | 55 (18.4)            | 201 (34.0)       | <0.0001        | 6 (2.4)              | 1 (0.2)          | 0.006          |
| Pacemaker-naïve patients                          | 55 (22.9) (240)      | 201 (41.2) (488) | <0.0001        | 6 (2.9)              | 1 (0.2)          | 0.006          |
| Bleeding                                          | 53 (17.7)            | 108 (18.2)       | 0.85           | 8 (3.2)              | 23 (4.5)         | 0.39           |

|                                                    |           |           |       |          |          |       |
|----------------------------------------------------|-----------|-----------|-------|----------|----------|-------|
| Life-threatening or Disabling                      | 29 (9.7)  | 58 (9.8)  | 0.96  | 6 (2.4)  | 13 (2.5) | 0.90  |
| Myocardial Infarction                              | 13 (4.3)  | 20 (3.4)  | 0.47  | 4 (1.6)  | 15 (2.9) | 0.27  |
| Repeat procedure for valve-related dysfunction     | 6 (2.0)   | 1 (0.2)   | 0.007 | 2 (0.8)  | 2 (0.4)  | 0.60  |
| TAVR                                               | 5 (1.7)   | 0 (0.0)   | 0.004 | 1 (0.4)  | 0 (0.0)  | 0.33  |
| Surgical AVR                                       | 0 (0.0)   | 1 (0.2)   | >0.99 | 1 (0.4)  | 2 (0.4)  | >0.99 |
| Other                                              | 1 (0.3)   | 0 (0.0)   | 0.34  | 0 (0.0)  | 0 (0.0)  | undef |
| Hospitalization                                    | 42 (14.0) | 71 (12.0) | 0.38  | 17 (6.7) | 39 (7.6) | 0.67  |
| New onset of atrial fibrillation or atrial flutter | 14 (4.7)  | 39 (6.6)  | 0.26  | 0 (0.0)  | 0 (0.0)  | undef |
| Prosthetic aortic valve thrombosis                 | 0 (0.0)   | 11 (1.9)  | 0.02  | 0 (0.0)  | 5 (1.0)  | 0.18  |

Binary event rates in the intention-to-treat patient population. Numbers are n (%). Hospitalization for valve-related symptoms or worsening congestive heart failure (NYHA class III or IV). Undef=undefined

A. CoreValve High Risk

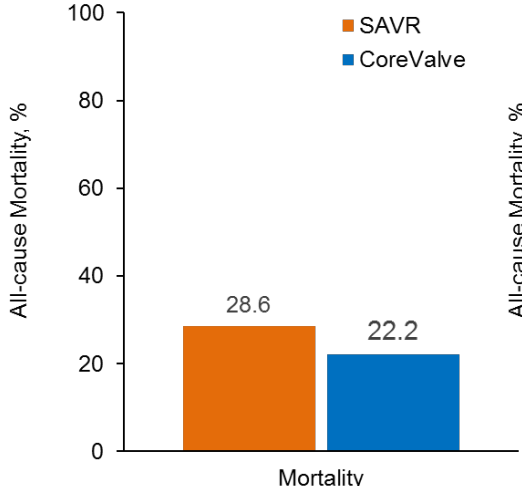

B. REPRISE III

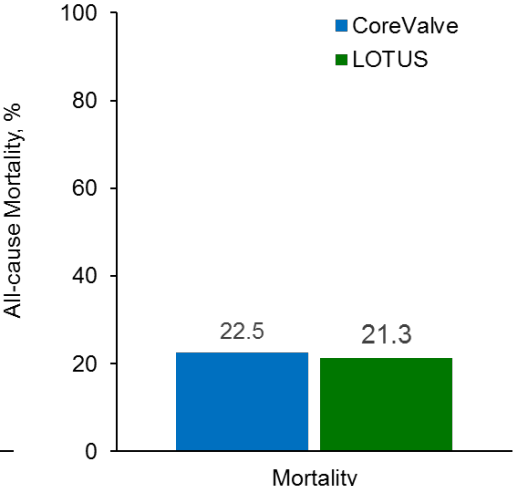

**eFigure. Mortality at 2 years in high-risk TAVR Randomized Trials**

Mortality at 2 years in the A) CoreValve High Risk trial and B) REPRISE III trial.
